# Supplementary material
Source: PubMed Central journal article supplement (PMC3573262)
Supplement: NIHMS414993-supplement-S1.pdf [file NIHMS414993-supplement-S1.pdf]

## Supplementary Figure 1 (Domingos-Pereira et al.)

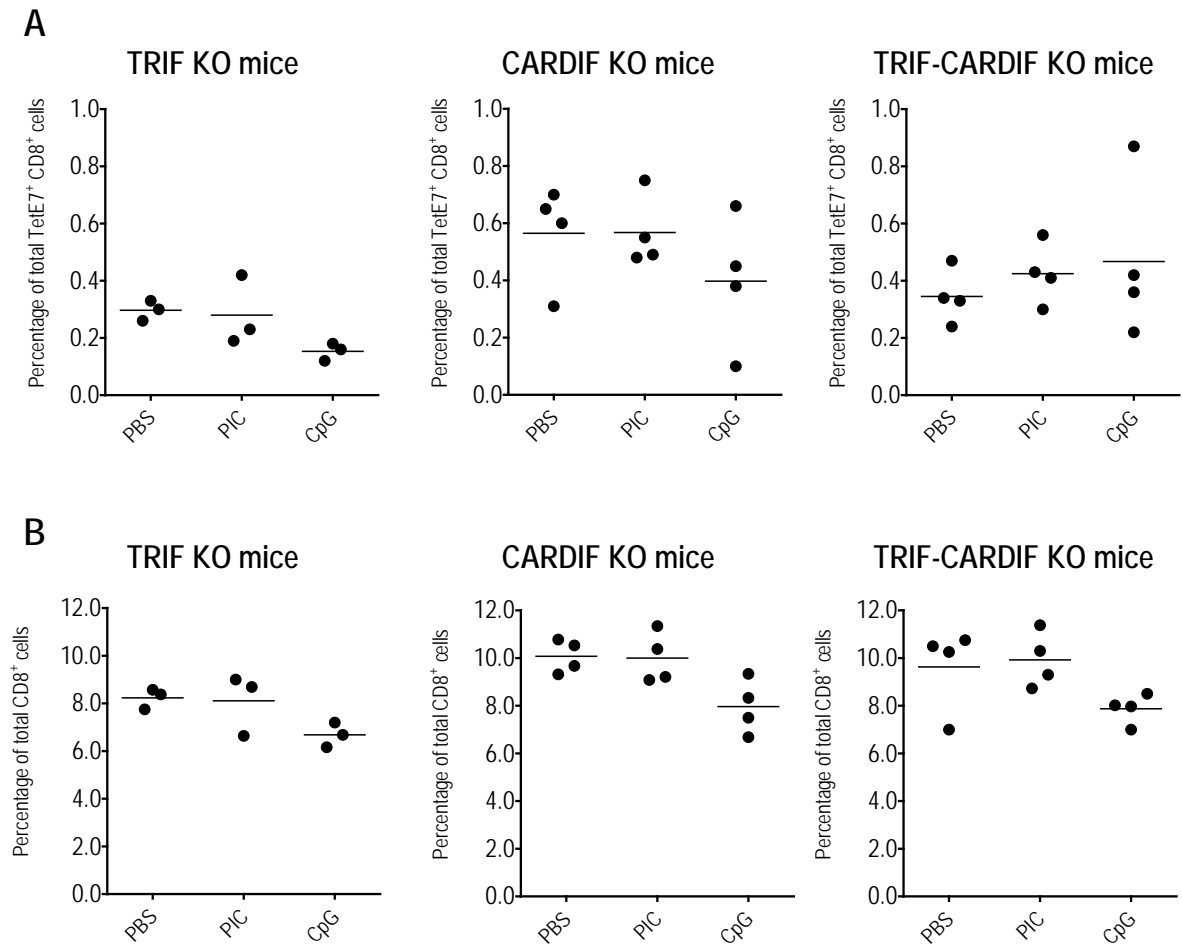

### Supplementary Figure 1

E7-specific and total CD8 T cells in spleen of E7-immunized Trif KO, Cardif KO and Trif-Cardif double KO mice, instilled with ivag CpG or PIC. Groups of Trif KO (left panels), Cardif KO (middle panels) and Trif-Cardif double KO (right panels) mice were s.c. immunized with the adjuvanted E7 vaccine and 5 days later ivag instilled with PBS, PIC or CpG. Mice were sacrificed three days later and cells recovered from individual spleen were stained with CD8-APC antibodies and TetE7<sub>49-57</sub>-PE or TetL1<sub>165-173</sub>-PE (as control). The percentages of TetE7<sup>+</sup> CD8<sup>+</sup> cells (A) and total CD8<sup>+</sup> (B) cells are indicated. The horizontal bars represent the mean percentages.

## Supplementary Table 1 *(Domingos-Pereira et al.)*

E7-specific CD8 T cell responses in E7-vaccinated mice ivag challenged with different immunostimulants.

| ivag immunostimulant | Mean $\pm$ SEM of E7-specific IFN- $\gamma$ secreting cells / $10^5$ cells |                    |                     |
|----------------------|----------------------------------------------------------------------------|--------------------|---------------------|
|                      | PBMC                                                                       | GLN                | Spleen              |
| PBS                  | 149.7 $\pm$ 45.2 (3) <sup>†</sup>                                          | 34.7 $\pm$ 6.8 (3) | 53.5 $\pm$ 5.3 (3)  |
| CpG                  | 177.3 $\pm$ 10.4 (4)                                                       | 36.5 $\pm$ 6.5 (4) | 70.8 $\pm$ 8.3 (4)  |
| PIC                  | 270.3 $\pm$ 77.3 (4)                                                       | 24.3 $\pm$ 4.1 (4) | 67.3 $\pm$ 13.6 (4) |

<sup>†</sup> The number of mice in each group is indicated in parenthesis

## Supplementary Table 2

### A. T cell coreceptor modulation by CpG in the genital tract (data extracted from the supplementary Table 1 in Lindqvist et al. <sup>20</sup>)

| T cell coreceptor | 4 hours          |                                | 24 hours         |                                | 48 hours         |                                |
|-------------------|------------------|--------------------------------|------------------|--------------------------------|------------------|--------------------------------|
|                   | Adjusted P value | log <sub>2</sub> fold increase | Adjusted P value | Log <sub>2</sub> fold increase | Adjusted P value | Log <sub>2</sub> fold increase |
| CD4               | 0.06             | - 0.36                         | 5.29E-05         | - 0.76                         | 0.15             | -0.34                          |
| CD8a              | 0.19             | 0.25                           | <b>1.05E-03</b>  | <b>0.57</b>                    | <b>2.77E-04</b>  | <b>0.72</b>                    |
| CD8b              | 0.45             | 0.20                           | <b>4.12-E03</b>  | <b>0.62</b>                    | <b>2.54E-02</b>  | <b>0.56</b>                    |

### B. Chemokine and respective receptors both significantly increased by CpG in the genital tract (data extracted from the supplementary Table 1 in Lindqvist et al. <sup>20</sup>)

| Chemokines and respective receptors increased by CpG | 4 hours                     |                                | 24 hours         |                                | 48 hours         |                                |
|------------------------------------------------------|-----------------------------|--------------------------------|------------------|--------------------------------|------------------|--------------------------------|
|                                                      | Adjusted P value            | log <sub>2</sub> fold increase | Adjusted P value | Log <sub>2</sub> fold increase | Adjusted P value | Log <sub>2</sub> fold increase |
| Ccl 2                                                | <b>4.83E-14<sup>a</sup></b> | <b>3.31</b>                    | <b>6.73E-13</b>  | <b>2.83</b>                    | <b>1.74E-09</b>  | <b>2.24</b>                    |
| Ccl 3                                                | <b>1.42E-06</b>             | <b>3.62</b>                    | <b>1.28E-03</b>  | <b>2.21</b>                    | <b>3.63E-04</b>  | <b>2.78</b>                    |
| Ccl 4                                                | <b>1.54E-11</b>             | <b>2.45</b>                    | <b>1.73E-11</b>  | <b>2.34</b>                    | <b>9.41E-05</b>  | <b>1.77</b>                    |
| Ccl 5                                                | <b>5.10E-10</b>             | <b>2.68</b>                    | 0.054            | 0.63                           | <b>8.29E-11</b>  | <b>1.44</b>                    |
| Ccl 7                                                | <b>8.73E-13</b>             | <b>3.10</b>                    | <b>8.22E-14</b>  | <b>3.36</b>                    | <b>7.40E-11</b>  | <b>2.75</b>                    |
| Ccl 8                                                | 0.20                        | 0.63                           | <b>1.54E-03</b>  | <b>1.40</b>                    | 0.31             | 0.63                           |
| Ccl 12                                               | <b>2.28E-08</b>             | <b>2.50</b>                    | <b>8.08E-13</b>  | <b>3.72</b>                    | <b>1.62E-08</b>  | <b>2.69</b>                    |
| Ccl 19                                               | <b>9.97E-14</b>             | <b>2.53</b>                    | <b>7.56E-10</b>  | <b>1.67</b>                    | 0.37             | 0.30                           |
| Cxcl 9                                               | <b>4.01E-05</b>             | <b>2.05</b>                    | <b>1.16E-12</b>  | <b>4.59</b>                    | <b>1.50E-02</b>  | <b>1.33</b>                    |
| Cxcl 10                                              | <b>3.29E-08</b>             | <b>4.77</b>                    | <b>9.51E-05</b>  | <b>2.92</b>                    | 0.20             | 1.25                           |
| Cxcl 11                                              | <b>6.79E-11</b>             | <b>2.49</b>                    | <b>3.42E-06</b>  | <b>1.43</b>                    | 0.74             | 0.18                           |
| Ccr 1                                                | <b>3.13E-02</b>             | <b>1.16</b>                    | 0.23             | 0.69                           | 0.78             | 1.37                           |
| Ccr 2                                                | 0.70                        | 0.18                           | <b>9.06E-04</b>  | <b>1.14</b>                    | <b>4.51E-04</b>  | <b>1.37</b>                    |
| Ccr 5                                                | <b>1.75E-03</b>             | <b>0.94</b>                    | <b>2.87E-10</b>  | <b>2.28</b>                    | <b>6.64E-11</b>  | <b>2.64</b>                    |
| Ccr 7                                                | <b>8.32E-09</b>             | <b>1.28</b>                    | <b>1.71E-02</b>  | <b>0.44</b>                    | 0.99             | 0.03                           |
| Cxcr 3                                               | 0.33                        | -0.29                          | 0.96             | 0.02                           | <b>1.63E-03</b>  | <b>0.91</b>                    |

### C. Adressin/selectin and respective ligand(integrin) both significantly increased by CpG in the genital tract (data extracted from the supplementary Table 1 in Lindqvist et al. <sup>20</sup>)

| Adressins/selectin and respective ligand induced by CpG | 4 hours          |                                | 24 hours         |                                | 48 hours         |                                |
|---------------------------------------------------------|------------------|--------------------------------|------------------|--------------------------------|------------------|--------------------------------|
|                                                         | Adjusted P value | log <sub>2</sub> fold increase | Adjusted P value | Log <sub>2</sub> fold increase | Adjusted P value | Log <sub>2</sub> fold increase |
| Vcam                                                    | <b>1.97E-05</b>  | <b>1.64</b>                    | 0.62             | 0.24                           | 0.60             | 0.33                           |
| Icam1                                                   | <b>3.63E-09</b>  | <b>1.79</b>                    | <b>4.95E-03</b>  | <b>0.70</b>                    | <b>3.26E-02</b>  | <b>0.63</b>                    |
| Madcam                                                  | 0.40             | 0.15                           | <b>3.95E-03</b>  | <b>0.44</b>                    | 0.83             | -0.07                          |
| Glycam1                                                 | <b>2.18E-06</b>  | <b>1.31</b>                    | <b>2.21E-02</b>  | <b>0.59</b>                    | 0.06             | 0.57                           |
| E selectin                                              | <b>4.30E-05</b>  | <b>1.72</b>                    | 0.37             | 0.42                           | 0.75             | 0.25                           |
| P selectin                                              | <b>2.82E-10</b>  | <b>2.19</b>                    | <b>3.38E-02</b>  | <b>0.59</b>                    | 0.24             | 0.43                           |
| L selectin                                              | <b>3.84E-03</b>  | <b>1.72</b>                    | <b>2.78E-03</b>  | <b>1.75</b>                    | <b>1.82E-02</b>  | <b>1.60</b>                    |
| ESL-1                                                   | 1.35E-02         | -0.41                          | 0.88             | 0.04                           | <b>3.94E-02</b>  | <b>0.39</b>                    |
| PSGL-1                                                  | 0.28             | 0.43                           | 0.32             | 0.40                           | <b>4.53E-03</b>  | <b>1.11</b>                    |
| CD43                                                    | 0.13             | 0.29                           | <b>2.98E-03</b>  | <b>0.53</b>                    | <b>2.26E-13</b>  | <b>2.01</b>                    |
| Alpha 4                                                 | 0.57             | 0.21                           | 0.13             | 0.47                           | <b>4.04E-05</b>  | <b>1.17</b>                    |
| Alpha L                                                 | <b>4.19E-04</b>  | <b>1.28</b>                    | <b>1.98E-05</b>  | <b>1.56</b>                    | <b>1.28E-06</b>  | <b>2.05</b>                    |
| Alpha M                                                 | <b>1.76E-02</b>  | <b>0.96</b>                    | <b>1.92E-07</b>  | <b>2.25</b>                    | <b>2.92E-11</b>  | <b>3.62</b>                    |
| Beta 2                                                  | 0.10             | 0.64                           | <b>2.00E-07</b>  | <b>2.10</b>                    | <b>2.52E-11</b>  | <b>3.40</b>                    |
| Beta 7                                                  | 0.17             | 0.34                           | <b>3.07E-04</b>  | <b>0.83</b>                    | 0.08             | 0.49                           |

<sup>a</sup> significant adjusted p value and respective fold increase are indicated in bold

### Supplementary Table 3 (Domingos-Pereira et al.)

A. CD4 and CD8 T-cells expressing the indicated chemokine receptor in spleen of E7-vaccinated mice receiving ivag PBS or CpG.

| Chemokine receptor | Chemokine receptor-expressing T-cells among total T-cells (Mean % $\pm$ SEM) |                |                |                |
|--------------------|------------------------------------------------------------------------------|----------------|----------------|----------------|
|                    | CD4                                                                          |                | CD8            |                |
|                    | PBS                                                                          | CpG            | PBS            | CpG            |
| CCR2               | 9.1 $\pm$ 0.6                                                                | 14.3 $\pm$ 0.6 | 3.1 $\pm$ 0.4  | 4.0 $\pm$ 0.3  |
| CCR5               | 5.7 $\pm$ 0.4                                                                | 15.1 $\pm$ 0.6 | 4.9 $\pm$ 0.5  | 8.5 $\pm$ 0.9  |
| CCR7               | 62.0 $\pm$ 1.3                                                               | 66.3 $\pm$ 0.7 | 50.3 $\pm$ 0.5 | 47.5 $\pm$ 0.7 |
| CXCR3              | 18.4 $\pm$ 0.5                                                               | 14.7 $\pm$ 0.6 | 45.0 $\pm$ 0.8 | 33.4 $\pm$ 1.8 |

B. CD4 and CD8 T-cells expressing the indicated selectin/integrin receptor in spleen of E7-vaccinated mice receiving ivag PBS or CpG.

| Selectin/Integrin receptor | Selectin/integrin-expressing T-cells among total T-cells (Mean % $\pm$ SEM) |                |                |                |
|----------------------------|-----------------------------------------------------------------------------|----------------|----------------|----------------|
|                            | CD4                                                                         |                | CD8            |                |
|                            | PBS                                                                         | CpG            | PBS            | CpG            |
| $\alpha$ L                 | 42.4 $\pm$ 3.3                                                              | 56.1 $\pm$ 1.6 | 49.8 $\pm$ 4.5 | 59.8 $\pm$ 2.5 |
| $\alpha$ 4                 | 23.6 $\pm$ 2.4                                                              | 27.8 $\pm$ 1.5 | 21.2 $\pm$ 1.5 | 20.9 $\pm$ 1.5 |
| $\alpha$ 4 $\beta$ 7       | 10.6 $\pm$ 1.2                                                              | 15.4 $\pm$ 2.4 | 16.2 $\pm$ 1.7 | 16.4 $\pm$ 1.5 |
| L-selectin                 | 68.4 $\pm$ 1.2                                                              | 64.1 $\pm$ 2.1 | 79.1 $\pm$ 4.0 | 73.2 $\pm$ 4.4 |
| E-selectin                 | 22.8 $\pm$ 1.8                                                              | 60.0 $\pm$ 1.8 | 15.1 $\pm$ 1.0 | 20.7 $\pm$ 1.0 |
| P-selectin                 | 10.9 $\pm$ 0.8                                                              | 13.5 $\pm$ 0.3 | 7.9 $\pm$ 0.8  | 10.1 $\pm$ 1.2 |
| PSGL-1                     | 89.0 $\pm$ 0.7                                                              | 86.0 $\pm$ 2.3 | 97.3 $\pm$ 0.2 | 96.0 $\pm$ 0.1 |
| CD43                       | 22.3 $\pm$ 2.9                                                              | 29.7 $\pm$ 0.6 | 21.5 $\pm$ 2.1 | 23.8 $\pm$ 2.1 |
